# Supplementary material
Source: MDPI journal article supplement (https://www.mdpi.com/1999-4907/7/11/274)
Supplement: s1 [file s1]

## Sheet: Table S1
Supplementary material Table S1. Primer sequences and references sequences. Primer sequences used to genotype the plant material for the microsatellite and to amplify and sequence the region around the targeted SNPs, and reference sequence from Oria 6 transcriptome with the SNP indicated within brackets.
chromosome	arm	marker name	marker type	Primer sequences		Reference sequence
				forward	reverse
1	upper	i04212s347pg	SNP	CCAAGTAGGGGTTGTCAGCT	CCTGGCTTCACTCACTCTGA	GAAATTCTCTGTAAATTAACAGAAACACAAGAATTCACTCATATAGGTTAAAAGAATTCACTCATATAGGTTTGATAATATAATTTATACAAAGCCAtCATTCAAAATTCATTCATGGCTTCCATGCATTTTTCAGTCTTAATAGTATTAAGACCTCCCATCACAGAACTCCAGATGCAAACCGGAGGAAGGACTCTGGTTTGTTTTGCATGGAAGATTACAAACCAGAAGAGGGACTCTGGTTTGCATGGAAGAATGCAAGGAAGTCCCATGTTAATACATAGCTGAGAAGAGCCCAAGCCCAACCCCAAGTAGGGGTTGTCAGCTTGTCTACCTCCATGACAAACATAGTAAATTTACCGTATAGTTGTACTGATATGGATGATGATGAGATATTCA…
1	lower	i13865s98	SNP	TCAAGTAAACTACAACCAGC	GCAATGGGTTCTATTGTGG	CATGCAAGTAGAAGCAGCTtCTATATTtCcAaTTTtATACAACATGATAATCTTAAATCAAGTAAACTACAACCAGCCCTTGCCTGGATTATAAAACTCGCATTTTCTTCATTTTCTGTACTCGTGATTTtCTTGTGCAATGTGGAATAAAAGCCCA[t]AAAAGATGCTATGTCCTTTCTTATTTGTTTTAAGTTTAAACTTTTGTTGACAAAGTGGAATCACAAATATATAATACGTTAGCCCTACATGCGAGGGGCAGTTAAATGACCCAAAACCATCCCACAATAGAACCCATTGCCAATCCAATTACCAAGAAGAGAACAATTGTGATCCCCGCAGTCTCTGATTCTTCAAGTGGAACTCTTTTTGGAGCAATAATCATGAGCACACTTGTGAA…
2	upper	i12078s1070	SNP	TGCCTACTGATGATGCGGAT	TGCTGTGATaGGAACCGTGA	TTtGAGGAGGACGATGAGGACGAGGACGAGGACGAAGAGGAAGAGGAGAATGATGCCTGGGAAGAGGTGGATGCAGGGGATGCcAGAGAAGACCAAGGTGAGCAGCGTGGTAATGAGGAGCCTGATCTGAATTCTGAAGAAAACACTGCGGCAAGCAATGATGCCGGAGAGAGGAGACCGACTTCAAGAAGGAGGGATGTTCTTCGGTTGCGAATAAGGGATTGGAATTCGCAGTCTGGGGGTGCGGTGCTTGAAACTTCAAGAGGAAGCTTGGATTGGAATGAGATAATGCAAGGCCTCGAGGACAATACGATTGAATTGAGAGTGAGTCTTCCtGAAGAGGATACTTATGTGGGCAATCCAGAGGATTATGTTGATGAGGCTGGATATGAAATTTTG…
2	lower	i11497s604	SNP	CTACTGTTTGAGCCTGTGG	AAGAGGCTGCTAGAACCG	ATAGGGAACAATTGTCATATACGACCAGACAaGGTTCCATGAATCTTTAATGCGGTAGAATGAGCCTGTGAATTACTCTGTTCGGACAAACTCACCCTTGGTTTACAGTGGAGCAGAAATGGCAGCTCTGAGGAAAATCCTGGTAAGTTATGCCTATGTTTGCTTGTGGATATTCCTAAGTTCCATGGTCATACTCTTCAACAAATATATTCTGGACAAGAAGATGTACAACTGGCCCTTCCCATTAAGCCTCACCATGATTCACATGGCCTTTTGCTCTGTCTTGGCATTTGCGTTGGTACGTCTGTGCAGATTTGTGGAGGAGCCTGTGGGCATGACCAAGAAAGTTTATGTTTCTTCAGTGATACCCATCAGCGCACTCTACTGTTTGAGCCTGTG…
3	upper	i09722s630	SNP	GAAGCATGCGTAGAAACCCA	GAAGACTGCGTTCACCTTCC	aaGCTTATGGAAACGATTGAATACCaaaagaTATCTGTATATCATATACCATAAATCTTGCATAGGAATTAGtATGCCACCAGAGTCTGGTTGAAAGGCATGACAGCCATAGCAAGTATGAATCATAATTCTTTGCAAACAGTACATCAAGAAaTAAAAAATCAATCCTAACAAACTCATTTGAGTACAATGCAGAATAACTCGGTAGCCTGCAACTTTGAAAAAATTGTACCTCCTACCTCCTACCCAACTAATACGTGATATTCATGATATCCTCTCAGATATCTCCTCTTGCTAGCACAATTAAATTCCTATTCTATTCTCCTAAACACTAGAGCAAAGAACGCACATCTAGCATTCTACCACCTGATTCTGCTCAAATGCAAATTTGAGCCTTGA…
3	lower	i11191s823pg	SNP	GTCCCAGAAGGAAACACAAGG	AGCACGGTCAAGTCACAGC	GGAAGGCACCCATTGCCAAAAGTGAGGAGTAGCAGGAGGAGATGAATGGATGATTGACTGACGGGCCTGTCTTTCAGACAATCAATCAATTCAATCTGTGTGCCTGAAAGTGTGGTGTCTGAATAAGAGGGGCCTCTTAAAATCAAATAAAACTGCAAATTATGAACATTACCATCTGTGCCTGAGAGTGTTCCGCTGCTATATGTATCTGGTTGTTGGATCTGGGATTTAAAATTGTTCAGACACTGGTTCTGTTCTTATCTTGGTCTTCTGAGTACTTGTGCTGAGTAGTGGTACAGAGTGGGATTGAAAGTTTTGTTTAGGGATGGAGGATTTAAACAGCTGGAGAGAGGGTAGAGGCCTGTGGATTGGAAACCCTTCATCTGAGGCAGAATTGGT…
4	upper	n10471	SNP	GGGTTGTGAGCAGGTGAAAG	TACGAACGATGCATGACAGC	GGTTTGTCAGTGAATCCAGTGTCTCAATCCGCAAACGGGATATTCAATCCGTCTCCGCAGTATTGTGTCTCCATGTTAATGCCTCGTACGGAAAAAGTTCCATAAACAATAGGAGAATCTCGGTTCCGAAACTCAGTGTGAAACGTTCTAGGGCTTCAACCGCTCAATTTTAATTCATATTCTTATTCGTAACATCCGCCTAAACCCTACAAAATTATTGATGCTCTGAGTTCGTCGGGAGTGCGAAACGATGGCTGCTGCATTGCTCGGATCTTGTTTCTCTGCGAGTCATCACCTGACCAACAGATTGGAATCGATCGCCCCCTCTTGCTTCCAGTCCCGTAGCTTGTTCGGCTCTTTCATACATTTTCCTTGCATAAAAAATGCATCAGGCCATCG…
4	lower	i14767s610	SNP	TGCCACACCCTCTTGCAACC	CATGACCGTGCATTCCTGAGC	TGATCCTCATAATAATGATATGGTAGATGCATAATATATTCTAATATACAGGGTATTTAACTATATATCATGTAAACGTGTTCAAATACAAGAGAGCCACGTCATCAACATATATTCgCACACTTATCTAACCTTTGACAACATTCAATAATCCACCACAGAAAGATGGGGATCTTTGAATCTCTCCTGCCTTTGGACAGCACTGAACAACCCACAGAAATATGAGGATCTTCGACGATCTGACGGATAGCTTCAgACTAGCATGCTATCTACATGTTTAATAATAATACGAATAATAGCAGTAAATAGTGCATGATATACTGATGTGTCCACAGTACTGTAAGATACACAATATAAATATATACAATCAAAAGAGAGTCATCTTCATCGTTCTCCTCT…
5	upper	i11426s280	SNP	AAAGCGATATCTGCCACCTT	CATTGCCACTTGAGTCTGC	TTTTTTtACCCAAACAACGGCAAaTtATTTTTTTAGgaTTAGAATAGATGAAAAaTCAGTTATGTCTACATCTATTTGTCTtAATACACTACCAACGGGAATAACAACCTTTTTATCAAAAGGAAAAAaCTACTGGACATAAAGCGATATCTGCCACCTTAATAGATATACGCATGAATTCTGTGAAGGTGCACAATTTCTTTCCATGGCAAGAATCAGTAGGATGAAATTAACACAAAACAGTAAAATTATAGTACTTAACACCTAATATATTTAAATCTTTTAAGAACCTGTCATGTACACATATTTATTGACCACTTCCTAAGGATCTTTGGAAAG[t]GCCCTTTACCTTAAGTGATCTTGAAACTGTCTCTTATAACTAAAGCAAACAAaCAAA…
5	lower	i09714s2101	SNP	AGACAAAGCCACGAACAAGG	CCTCTTCATATTCAGCCTCTGG	GGTCGAGGCGAAGAGGGTTTTAGTGAGGGTTTTAGGGCCTGAGAGGAGCCGATAAAGCGACGGTAGCGCGTCAGAGGGATTTTCTAAACAGACGTCCGATCTAGCTTGCTGCATGATTTTtAAAGTTTAGGtCTTTTGAAGCTCCTGATCAGTTCGGAAGAAGGaGAAAGCGATGGcTTtaGgTTCGCTATTGGTGTCCAGGCTTGCAAGGTCTCAGTCGAAGGGTATCGCTTCAAATGTTGTTCAATCTGCATATCTGGCTACACAGAATATTAAAtCTTCAAACTTTGGTTCGCCACTGATACAGAGATGGGGAAATGCAGCCAGAGCTTTCAGCTCAAAGGGAGCTGGTAATGATGTGATTGGTATTGATTTGGGAACAaCAAATTCATGTGTTGC…
6	upper	i17956s183	SNP	GTTGAAAGCTGCTCTAGTGG	AGGTTTCTGTGCAGTAGTGG	AAACGTCagCtATTTTTttCGAAaCAAAGTGATCGCAACAATATTATGATGTGAATATCACAaCAAAATGATCACAACAaTACTATAACCAGAAGTTTGTGGTTGTGTTCCAATAGTTAAGTAAGGAGGTCTGGTCGAcTCCCAAACAAGACTATGTCAAGTTGAAAGCTGCTCTAGTGGGATTTATTCCATTGAAAAGAAaCAAAAAAACAATACTATAAATTGAACAATGCAGCAGAGTG[c]AAGTGCTGCTGCTGCTCTTATTACAACCAAACCTCTGAACGGAAGCAAACAGAGAGCCGAAACGAAACGAAACGGAGGAGGAGGAGGAGGAAATATGTGTGTTTGTATAGAGAGAAAGGCATAGGCCTTCCTTTGCCGTTGTTTGACTTGCCAG…
6	lower	i09759s670	SNP	CCGCAACATAACAACCAGCA	TCGCTAAGGGTTGGGAAAGTC	GTCAGAAGAAaTCTTCATTtACGAGGAAATATAAACTGACCCGTTCCATCAAAGTATATTGCCAAACTCATGCAAACTGCAGTATGAATACCAAGGAATTAAAATTTTAGATATTAATGTTATTGAACATGctGCTCTCCACACAGTGAACGTTGACAACTGTCGAGAGAGTAGACGATAATAAATGATAGATATACAAAGACCTTCCTTTAGCATAAGAATAATAATCTTGCAGGACAGAACATTCCTCCATCATCAGATGTGGCACCTCGATCAGCTATAGAAATGATGAAACCACTAAGAAATGCTGATAATTAATAATCCCAGTAAGTCCCTAGTTCTAGGTTCTAATAAATTACATAATACATAAACCAATTTCACTCATTTAGCAGTTTATAG…
7	upper	i11168s1245	SNP	AACTCCTCCATACGCTGCA	GAAGCTCCATCAAAACTCCGC	AACACAATCTTATtAGGTTTGTTaGATATCGGATTTCAAAAATTAAAaCaGAACAGTGtCTTAGACAAGGCCCATTGACAGTGATTTGgaTTGGCCAAtATTTATACAGCATATTGAaGTTCGAAATCAGAAAATTCAACCAATTacaTAAAAAAAATTCCTTTACATACCAATATACATTATTgAAAAaatAAAAAtAAAAAaaTCAAGGTTGTCAAGAAGTAGGGCGTTTACTGAAGTAGCATGAACAAAGTACACAAGGTATTTTCATTATTTGTCCCCTGTTCATAATCTCCCCATCACCCGACTAAAATAAAATCAAaTATATAGGCATTAGAAATATACAGGTAAAGGATCTGAGGATGACAAGGACGACTCACGTCCACTTTATCAATCAGA…
7	lower	i10336s378	SNP	GGTCCTCGTACCTAAACAACC	CTGGGCTCGGTAGTTCTGG	GTCcTTCAGAACCAAaCATTtCATTAATTTATACTTATAGCAGATaagaaGCTATAACCTGGAaCTAAATTtCCCAATAAGCATCATCAGCAACaTAAAAGCATAAATTTCTCTTTGATTTTCCTTTGTTTATAGAATAACTTCCCcAAACCAGAAGGCcTTTtCGTCACTTAAATAGTTTATCTCAATATTAAATATTCAAATGGCTCTACATCAAAGAAATCTTAGATTGAGAACTGAAGACAAGGTCCTCGTACCTAAACAACCAAAATCTGAAATGAACCAGTTCTATTCAGATACCTAAACTTCTAAAGCTTATACCAACTATGCAATATGAAATTACTCAATGTTAATCCTGATAAATTGCTTGTGCGCCAATCTCTAAACAGGAATGATTAG…
8	upper	i14166s363	SNP	TCACCGAATCTATGTTGTAAGG	TAGAAGACGATGAAGATGACG	ACAATTAGAAATGATTTAGTTGATTAGATTGAaCTTTAAAAAGTGTGAATTTCCACGACAGGAAAAGGCCCTGAACACAGTAGAAATAACACAATATTTtCTATCCGTTGACAGCAGATCTTCAATACTATTTTTACCAACATCACTCCAATTGAGAAATTTTATCTGAGAATCGTGTAATAATCCAAATGATCTAGTATGGACCACTAAATTCAAATGAGACAACTTtCCTTCTCGATATACATTGTCAAAAaTAATAATAACCAGCATTGGTACAGACCAGTGCTGTACTGAAAATACTCAAGACACCTAAAaCAAACAaAAaTACATTCCCATGATCACCGAATCTATGTTGTAAGGTCCATGATGGCACTAACAATATCTCCATCTGCAGCTTTA…
8	lower	12469s328_gras	SNP	CACATACAAATCCCTCCTCC	GACCTAAATCCCCTGGTG	AGACCAAaGATTATGTACATTTCGATGTATGAtACAtAtGAAACAAGGAtAtAGAAGCTAATGATGAAAAAGATGCATAGCATTTGCAGAATAGGAGTGAAACAAGGAGTctGCTCATGTAGGCTCGTTAAAACATGGCTTCCACAAAGAGCAAAAAGTGACAGGATGACTCTTCCAACACAGAGAAATACACCCATCCTCCAAACGCATCTCCCAATTTGAATCATGTTTACGAAGCATGGCTCTTGCACAGTCAATTATTTTGTCACTAGGGATTTCACATACAAATCCCTCCTCCCTAACTCTATTGGCCCAGTTCAAATGGTTCTCGTTTCTCTCCACACGAGAAGCACCATCATATGCTACATTATTAACTAACCCCATGGC[a]GCCTCGCCT…
9	upper	i11300s1197	SNP	CCGAGAGACTTAGTGTACCT	TTACCTCCAATGTCTCAAGC	AaCCCTTCATAAGCcGgTtGATTCAAGCACGGTTCCGGAGATCGGAACTCGAAAAGGCGCCGCAGATCGGATGGCAAAGaCAAATaCAAATACCCATAAGCAAGAaCAGCACGCGTCGGAATTTTCCGTtGTTTCGAGTtCGCCGGCTCACGAACGGGAGCCGCAGCACCCGCAGCTGCAGGTTCCGATTCAAGAATTCCAGAAATTTCACCTGAGGCAACCGGAaGAGACAGTGCCTTGGCCGGTGGACCCTAACGGAAaCCTTAGGAAAATATATtCTGGCCAGgAAaGAGCTGTGGATTTTtCACATACCCGGCCcGATCTTGCACAGGATCAGCCCCACATGGaGgCACAGAATCATCAGAGCCAGTTTCCATCCGAGTACTACACGCAGCAACA…
9	lower	i10624s225	SNP	GAAGAAGGGCAATAGTGTCG	GTTAATGATGGAAGAAAAGGG	cGTCCGATtGTTATTATATccAGAaCGCGtACAgCATAGgTtCATTTtCaTGTAAaCACCGGCATCTGTTATgAGgAGagaCtctATTTTAAACTCGAATCTcTTAAAGTGTTCATCGATCAAATTGATTTATTAATTCTTATTTAAGATAAACACTATAACTAAAGTACAGgTTGAAGAAGGGCAATAGTGTCGAAGTTTCACTAATTAAAACCACTTGAAACACGCAACTCTCTGgTTATTTTCAGAAGCGCGGTGACATATTCAAGATGCCTAGAGGGTTT[C]cAGATTTGATGATGGCGTTATGTCTACAGAGACATGACTTCGGAGACGAACAGGTCGAGATTCTTGGCGGAGGAGCCaCCCTCGGCCACCGCTGCTCTTGCAGCCGCCTTCA…
10	upper	A6F03	SSR	CCTGAAAATCGACGGATCG	ATGGTATTTTGCGGGTTGC
10	lower	i01797s1096	SNP	CCTACTGTGGCAACTCAACC	CGAGGACTTTGTCTCTGACG	CAAAGgTTTGgTgaTAACAATTGGCAAATTAtCCTTCTTGGATGTTACATTACATTACACcTTAAATTTGATATATCTGCTTAACATCGTAAAAaCCCATAATACCACTACACTACACCTTAAATGTAGAaGGTAAAAGATgCTGATTTGACTATTtGACTACATAAAaCCTATATCCCAACTGATTCATTTCATTATCCCAACTGATTCATCCAATGATAAAaTGAGAAAATCCGAACATCTCTTAACAAATAGAAGACCTCAATtAGAGGAAAAaGCAGCCATTGTCATTGTCACTATATCCAGGAATACTCATAGAAAGCAGCCCGCTGACTAGAAGCAGATATGCAATCAAAAATTAACTCTCGCTTGGAAAAATGACGAAACGTAGAACTCATC…
11	upper	i13232s811c	SNP	AATAAAGTGGGTGTAGTGC	CCCTATAATCGTGTATATCCTGC	TTTGCCCAATTCCAAATCAACCAGCCATATTtCATACcAGGAGAAAAaTTCAAaGAATCATTTGTTTTGCACAAAGACCAAATTGAaGACGAAAATTTtCAAGTAAATGCATTTTGAAACCTGAAGGCTCCCAAACACGCCCATATATGGGATGTATATAGTACAAAAATCAAAaTAAAAATCACTATTTTCATGAATAATTGCAAACAACTTTCACTGCACTTCCGCATTGTAGTGCTTCAATTACATCATCCTTTAGTACAGATTGACAGGTCGATAATATGCATTATGAAATAATACATACCAGATACCAAAATATCAAGCCAACTCAATCAGTCACGCACAGACTAGTAATAACTCAAATCAACTACCAGCTGCTACAGATCTCACCATCTAATA…
11	lower	i09872s2006	SNP	CTTACAAGACCAAATGCTGC	TCAAGTAAGTGGGAAGAAGC	TAagCGgAAGgAACGAGAATTGAGTGCATCAAAtACAAATTGAACTTaCAATGGATCTGGCAGTGGAAAGTGTTGCTTCAGATTTAGCAAGTCAAGAATAAAATATTGCAACAATTGTTTTGAATTGTGATAATTGCAAACAAGTCCTCTTCAAAATAATAAATTGGACATATGATACATTTCAAAAATTGATTGCTAAAATGAGCAATCAAAGAGAGCCTACTCACGTAGATGGTACAGTTTTTtAACAACTCCCTTTTtCAGCTTCACATGAGCATACCCTTTTtGGAAGGGTAAGGGTTCAATAGATCCATCTTCATGAAATAGTCCAAAGCAATAGCAGCTGCAATAAAAATAAGCATGCTCTCACTGAGCATAAAGCCCGTATCAAGAGCATGT…
12	upper	i12210s651	SNP	CCTCCTGTCTATGTTTCTCAGC	CGTATGAATCTTCGGTTGG	GGACtCCAATTATTAATTAAaTCAGTCAGTCCAAATGAATCGGACCCCcAGCCGAGCCGAGCCGGCCAATCTGTAAACTCCCCCGTGAATAAAAATCTCAgCTGTGGCAGCGGCGCTAGAGTCGCTCTAAGATCCATGGCCGAGTTTATCCAGAGGTTGATTCTgaCGTTCATTGTCATGGGATTTCTGTGTCACAGCTTCAAATGGGTATCAGCAGGTGGCCCCATTCAGGCCCcTCAGGCTGGATTCGCAGGTTCAGGTTCTCCTGCATTGGTGCCATCGAAATCGCCATTTTCTtCTTTCTTGCCATCTCCCAAGAGCGCTGTTTCGGTACCCACTGCTGCTGCTCCCTCTAACTCCATTCTCGGATCCCCAATTTCTGCCCCTGTCCATTCAATC…
12	lower	i15731s335	SNP	AGCAACATGAAGGGAAGC	TGAGTGACTCCAGAGATG	TTAAACAAATGCAGATATTATTTCATGGAAATGATTACTCATTAGAATAACAAATTGATGAAACATTTTtAACCTTTATCTGTTGTAAGTGTATACAACGAAGACACACATGCTAAAATCTGCTGTATGCCGTTGTTTGTTGAGACTATAGCTTGAGTTAGGATGGCTAGCTTCACAAATCTCGTTCTGGCTACGGTCTATGATTTACGGATATATTCATGATCCAGCATTACCCGGAGCCTTATTCCATTTATATCAATCAAGCAACATGAAGGGAAGCCTTCTTCCTCAACCAGACCCCAACGAATGAAGTTACAAAAGCAATTCAATGTACTATGTGTAATGAAACAACTAGTAATGTTTCTGCAAGGGTAGCAGAAGCTCACAACAATGT[G]gT…
